# Supplementary material for: Spike S2 Subunit: Possible Target for Detecting Novel SARS-CoV-2 Variants with Multiple Mutations
Source: MDPI journal article supplement (doi:10.3390/tropicalmed9020050), 2024-02-15
Supplement: s1 [file s1]

**Table S1.** Sequences of SARS-CoV-2 genome submitted from January to October 2022

| <b>Country</b>     | <b>Number of submitted virus</b> | <b>Start date</b> | <b>End date</b> |
|--------------------|----------------------------------|-------------------|-----------------|
| <b>USA</b>         | 61596                            | Jan 5, 2022       | Oct 2, 2022     |
| <b>Canada</b>      | 22234                            | Jan 5, 2022       | Oct 2, 2022     |
| <b>Australia</b>   | 5961                             | Jan 5, 2022       | Oct 2, 2022     |
| <b>Germany</b>     | 60955                            | Jan 5, 2022       | Oct 2, 2022     |
| <b>France</b>      | 7930                             | Jan 5, 2022       | Oct 2, 2022     |
| <b>England</b>     | 19110                            | Jan 5, 2022       | Oct 2, 2022     |
| <b>Italy</b>       | 9204                             | Jan 5, 2022       | Oct 2, 2022     |
| <b>Russia</b>      | 1191                             | Jan 5, 2022       | Oct 2, 2022     |
| <b>China</b>       | 143                              | Jan 5, 2022       | Oct 2, 2022     |
| <b>Japan</b>       | 6815                             | Jan 5, 2022       | Oct 2, 2022     |
| <b>South Korea</b> | 5014                             | Jan 5, 2022       | Oct 2, 2022     |
| <b>India</b>       | 12353                            | Jan 5, 2022       | Oct 2, 2022     |
| <b>Iceland</b>     | 129                              | Jan 5, 2022       | Oct 2, 2022     |
| <b>Brazil</b>      | 1476                             | Jan 5, 2022       | Oct 2, 2022     |
| <b>Spain</b>       | 6206                             | Jan 5, 2022       | Oct 2, 2022     |
| <b>Belgium</b>     | 7731                             | Jan 5, 2022       | Oct 2, 2022     |
| <b>Turkey</b>      | 936                              | Jan 5, 2022       | Oct 2, 2022     |
| <b>Peru</b>        | 272                              | Jan 5, 2022       | Oct 2, 2022     |
| <b>Chile</b>       | 408                              | Jan 5, 2022       | Oct 2, 2022     |
| <b>Thailand</b>    | 1157                             | Jan 5, 2022       | Oct 2, 2022     |
| <b>Total</b>       | <b>230,821</b>                   |                   |                 |

**Table S2:** Mutations in the binding sites of primers and probe.

| Primer      | Lineage      | Country | Mutation<br>in primer | Mutation<br>in 3' end | Number<br>sequences | Frequency<br>(Total<br>230,821) |
|-------------|--------------|---------|-----------------------|-----------------------|---------------------|---------------------------------|
| <b>S2F</b>  | BA.1.1.7     | India   | 18                    | 5                     | 1                   | 0.0004%                         |
|             | Unassigned   | India   | 5                     | 5                     | 1                   | 0.0004%                         |
|             | B.1.1        | Turkey  | 4                     | 4                     | 1                   | 0.0004%                         |
|             | B.1.1        | Turkey  | 3                     | 3                     | 1                   | 0.0004%                         |
|             | BA.1         | Turkey  | 3                     | 2                     | 1                   | 0.0004%                         |
|             | B.1.1        | Turkey  | 2                     | 2                     | 1                   | 0.0004%                         |
|             | BA.5.3.2     | Germany | 4                     | 1                     | 1                   | 0.0004%                         |
|             |              |         | 1                     | 1                     | 65                  | 0.0282%                         |
|             |              |         | 5                     | 0                     | 6                   | 0.0026%                         |
|             |              |         | 3                     | 0                     | 1                   | 0.0004%                         |
|             |              |         | 2                     | 0                     | 1                   | 0.0004%                         |
|             |              |         | 1                     | 0                     | 250                 | 0.1083%                         |
|             | <b>Total</b> |         |                       |                       | <b>330</b>          | <b>0.1430%</b>                  |
| <b>S2R</b>  | Unassigned   | USA     | 4                     | 4                     | 1                   | 0.0004%                         |
|             | B.1.1.529    | USA     | 4                     | 3                     | 1                   | 0.0004%                         |
|             | BA.2         | Turkey  | 3                     | 3                     | 1                   | 0.0004%                         |
|             | BA.1         | Turkey  | 3                     | 1                     | 1                   | 0.0004%                         |
|             |              |         | 1                     | 1                     | 171                 | 0.0741%                         |
|             |              |         | 5                     | 0                     | 7                   | 0.0030%                         |
|             |              |         | 4                     | 0                     | 1                   | 0.0004%                         |
|             |              |         | 3                     | 0                     | 3                   | 0.0013%                         |
|             |              |         | 2                     | 0                     | 2                   | 0.0009%                         |
|             |              |         | 1                     | 0                     | 179                 | 0.0775%                         |
|             | <b>Total</b> |         |                       |                       | <b>367</b>          | <b>0.1590%</b>                  |
| <b>S2Pr</b> | BA.1         | Turkey  | 4                     | 4                     | 1                   | 0.0004%                         |
|             | BE.1         | Turkey  | 3                     | 3                     | 1                   | 0.0004%                         |
|             | BA.2.12.1    | USA     | 3                     | 3                     | 1                   | 0.0004%                         |
|             | BA.1         | USA     | 2                     | 2                     | 1                   | 0.0004%                         |
|             |              |         | 1                     | 1                     | 44                  | 0.0191%                         |
|             |              |         | 2                     | 0                     | 5                   | 0.0022%                         |
|             |              |         | 1                     | 0                     | 1085                | 0.4701%                         |
|             | <b>Total</b> |         |                       |                       | <b>1138</b>         | <b>0.4930%</b>                  |
